# Supplementary material
Source: PubMed Central journal article supplement (PMC7964133)
Supplement: 1806_tables.pdf [file 1806_tables.pdf]

**On-Line Table 1: The group differences on each region identified by ADC-GRP VBA and their combination<sup>a</sup>**

| Cluster | Anatomic Names                                             | Side | MNI         |         | ADC   |         | FA   |         | AD    |         | RD    |         |
|---------|------------------------------------------------------------|------|-------------|---------|-------|---------|------|---------|-------|---------|-------|---------|
|         |                                                            |      | Coordinates | x, y, z | t     | P Value | t    | P Value | t     | P Value | t     | P Value |
| 1       | Anterior cingulate, gyrus, cingulate, corpus callosum      | R    | 23,14,35    |         | -5.20 | .00     | 4.70 | .00     | -0.26 | .80     | -5.56 | .00     |
| 2       | Precentral gyrus, cingulate gyrus                          | L    | -17,11,40   |         | -4.88 | .00     | 2.53 | .02     | -1.58 | .13     | -4.44 | .00     |
| 3       | Parietal lobe, precuneus                                   | L    | -23,-54,51  |         | -4.42 | .00     | 0.00 | .26     | -1.19 | .25     | -2.75 | .01     |
| 4       | Insula                                                     | L    | -29,10,22   |         | -4.30 | .00     | 1.78 | .09     | -1.29 | .21     | -3.97 | .00     |
| 5       | Thalamus, mammillary body                                  | L    | -13,-13,7   |         | -5.47 | .00     | 1.21 | .24     | -1.98 | 0.06    | -5.45 | .00     |
| 6       | Precentral gyrus, insula, lentiform nucleus, parietal lobe | L    | -31,-13,28  |         | -6.12 | .00     | 2.80 | .01     | -0.98 | 0.34    | -4.64 | .00     |
| Total   | Above                                                      | R/L  | Above       |         | -7.14 | .00     | 4.03 | .00     | -1.72 | 0.10    | -7.08 | .00     |

<sup>a</sup> The first column gives the region identification where the total indicates the combination of those regions, and the following columns give the anatomic name, left/right, MNI coordinates, and unpaired *t* test. The *P* values have been corrected for multiple dependent comparisons.

**On-Line Table 2: The linear correlation between test score (RPCSQ) and indices (ADC, FA, AD and RD) on each region identified by ADC-RPCSQ VBA and their combination<sup>a</sup>**

| Cluster | Anatomic Names                                                              | Side | MNI         |         | ADC   |       | FA   |      | AD    |       | RD    |       |
|---------|-----------------------------------------------------------------------------|------|-------------|---------|-------|-------|------|------|-------|-------|-------|-------|
|         |                                                                             |      | coordinates | x, y, z | r     | Bdp   | r    | Bfp  | r     | Bdp   | r     | Bdp   |
| 1       | Middle and superior temporal gyrus                                          | L    | -41,-53,16  |         | -0.71 | -1.07 | 0.24 | 1.21 | -0.07 | -0.33 | -0.44 | -1.45 |
| 2       | Inferior and supramarginal parietal lobe                                    | L    | -43,-48,36  |         | -0.61 | -1.47 | 0.33 | 1.59 | -0.10 | -0.41 | -0.51 | -2.01 |
| 3       | Posterior cingulate, temporal lobe, occipital lobe, parietal lobe precuneus | L    | -14,-66,28  |         | -0.77 | -2.83 | 0.56 | 2.20 | -0.37 | -1.31 | -0.75 | -3.59 |
| 4       | Precentral, middle, inferior frontal gyrus                                  | L    | -35,4,43    |         | -0.70 | -1.81 | 0.48 | 2.95 | 0.07  | 0.29  | -0.60 | -2.85 |
| 5       | Frontal lobe, precentral and middle gyrus                                   | R    | 29,12,33    |         | -0.84 | -1.32 | 0.50 | 1.54 | -0.19 | -0.59 | -0.81 | -1.68 |
| 6       | Frontal lobe, middle frontal gyrus                                          | R    | 35,25,31    |         | -0.85 | -1.67 | 0.57 | 2.84 | 0.07  | 0.22  | -0.76 | -2.62 |
| 7       | Temporal lobe, middle temporal gyrus                                        | R    | 53,-46,-2   |         | -0.71 | -1.17 | 0.57 | 2.25 | 0.10  | 0.32  | -0.72 | -1.91 |
| Total   | Above                                                                       | R/L  | Above       |         | -0.94 | -1.37 | 0.69 | 1.91 | -0.08 | -0.16 | -0.90 | -2.32 |

<sup>a</sup> The first column gives the region identification where the total indicates the combination of those regions, and the following columns give the anatomic name, left/right, MNI coordinates, and Spearman correlation for diffusivities and FA.

**On-Line Table 3: The linear correlation between test score (BSI) and indices (ADC, FA, AD and RD) on each region identified by ADC-BSI VBA and their combination<sup>a</sup>**

| Cluster | Anatomic Names                                        | Side | MNI         |         | ADC   |       | FA   |      | AD    |       | RD    |       |
|---------|-------------------------------------------------------|------|-------------|---------|-------|-------|------|------|-------|-------|-------|-------|
|         |                                                       |      | coordinates | x, y, z | r     | Bdb   | r    | Bfb  | r     | Bdb   | r     | Bdb   |
| 1       | Inferior and middle temporal lobe                     | L    | -45,-9,-20  |         | -0.59 | -1.68 | 0.25 | 1.36 | -0.21 | -1.54 | -0.50 | -1.74 |
| 2       | Superior and middle temporal gyrus                    | L    | -44,-53, 11 |         | -0.60 | -3.15 | 0.48 | 6.99 | 0.26  | 2.53  | -0.56 | -5.99 |
| 3       | Medial frontal gyrus, anterior cingulate              | L    | -10, 40,-10 |         | -0.66 | -2.25 | 0.37 | 1.32 | -0.38 | -1.69 | -0.69 | -2.51 |
| 4       | Inferior and medial frontal gyrus, anterior cingulate | R    | 16, 33,-12  |         | -0.73 | -1.84 | 0.32 | 1.38 | -0.44 | -1.35 | -0.60 | -2.08 |
| 5       | Middle and superior frontal gyrus                     | R    | 25, 23, 48  |         | -0.77 | -6.24 | 0.56 | 6.47 | -0.29 | -2.17 | -0.73 | -8.31 |
| 6       | Middle frontal gyrus                                  | R    | 41, 41, 25  |         | -0.59 | -4.31 | 0.27 | 2.26 | -0.44 | -2.75 | -0.53 | -5.08 |
| 7       | Superior and middle temporal gyrus                    | R    | 60,-25, 3   |         | -0.66 | -5.84 | 0.39 | 1.75 | -0.62 | -5.16 | -0.65 | -6.18 |

<sup>a</sup> The first column gives the region identification where the total indicates the combination of those regions, and the following columns give the anatomic name, left/right, MNI coordinates, and Spearman correlation for diffusivities and FA.
